# Supplementary material for: Salivary microbial profiles in relation to age, periodontal, and systemic diseases
Source: PubMed Central journal article supplement (PMC5851536; doi:10.1371/journal.pone.0189374), 2018-03-14
Supplement: pone.0189374.s001.pdf [file pone.0189374.s001.pdf]

**Supplemental file S1.** Microbial panel analysed by checkerboard DNA-DNA hybridization.

| <b>Specie</b>                                 | <b>Collection</b> |
|-----------------------------------------------|-------------------|
| <i>Actinomyces israelii</i>                   | ATCC 12102        |
| <i>Actinomyces naeslundii</i>                 | ATCC 12104        |
| <i>Actinomyces oris</i>                       | ATCC 43146        |
| <i>Actinomyces odontolyticus</i>              | ATCC 17929        |
| <i>Aggregatibacter actinomycetemcomitans</i>  | ATCC 43718, 29523 |
| <i>Campylobacter gracilis</i>                 | ATCC 33236        |
| <i>Campylobacter rectus</i>                   | ATCC 33238        |
| <i>Campylobacter showae</i>                   | ATCC 51146        |
| <i>Capnocytophaga gingivalis</i>              | ATCC 33624        |
| <i>Capnocytophaga ochracea</i>                | ATCC 33596        |
| <i>Capnocytophaga sputigena</i>               | ATCC 33612        |
| <i>Eikenella corrodens</i>                    | ATCC 23834        |
| <i>Eubacterium nodatum</i>                    | ATCC 33099        |
| <i>Eubacterium saburreum</i>                  | ATCC 33271        |
| <i>Fusobacterium nucleatum ss nucleatum</i>   | ATCC 25586        |
| <i>Fusobacterium nucleatum ss polymorphum</i> | ATCC 10953        |
| <i>Fusobacterium nucleatum ss vincentii</i>   | ATCC 49256        |
| <i>Fusobacterium periodonticum</i>            | ATCC 33693        |
| <i>Gemella morbillorum</i>                    | ATCC 27824        |
| <i>Helicobacter pylori</i>                    | ATCC 43504        |
| <i>Leptotrichia buccalis</i>                  | ATCC 14201        |
| <i>Neisseria mucosa</i>                       | ATCC 19696        |
| <i>Parvimonas micra</i>                       | ATCC 33270        |
| <i>Porphyromonas gingivalis</i>               | ATCC 33277        |
| <i>Prevotella intermedia</i>                  | ATCC 25611        |
| <i>Prevotella melaninogenica</i>              | ATCC 25845        |
| <i>Prevotella nigrescens</i>                  | ATCC 33563        |
| <i>Selenomonas noxia</i>                      | ATCC 43541        |
| <i>Streptococcus anginosus</i>                | ATCC 33397        |
| <i>Streptococcus constellatus</i>             | ATCC 27823        |
| <i>Streptococcus intermedius</i>              | ATCC 27335        |
| <i>Streptococcus gordonii</i>                 | ATCC 10558        |
| <i>Streptococcus mitis</i>                    | ATCC 49456        |
| <i>Streptococcus oralis</i>                   | ATCC 35037        |
| <i>Streptococcus mutans</i>                   | ATCC 25175        |
| <i>Streptococcus salivarius</i>               | ATCC 27945        |
| <i>Streptococcus sanguinis</i>                | ATCC 10556        |
| <i>Tannerella forsythia</i>                   | ATCC 43037        |
| <i>Treponema denticola</i>                    | B1                |
| <i>Treponema socranskii</i>                   | S1                |
| <i>Veillonella parvula</i>                    | ATCC 10790        |

ATCC: American Type Culture Collection.
